# Supplementary material for: Does Calypogeia azurea (Calypogeiaceae, Marchantiophyta) occur outside Europe? Molecular and morphological evidence
Source: PubMed Central journal article supplement (PMC6179228; doi:10.1371/journal.pone.0204561), 2018-10-10

**S1 Fig. Neighbor joining (A) and maximum parsimony (B) consensus trees of the *Calypogeia azurea* complex.** The analyses were performed separately for a combined plastid loci and nuclear ITS2. Only the accessions with complete sequences of all loci were included in the analysis. The related taxa (*C. peruviana*, *C. granulata*, *C. tosana*) were used for comparison. *Calypogeia arguta* and *C. sullivantii* were used as an outgroup. Bootstrap values above 50% are given above the branches.

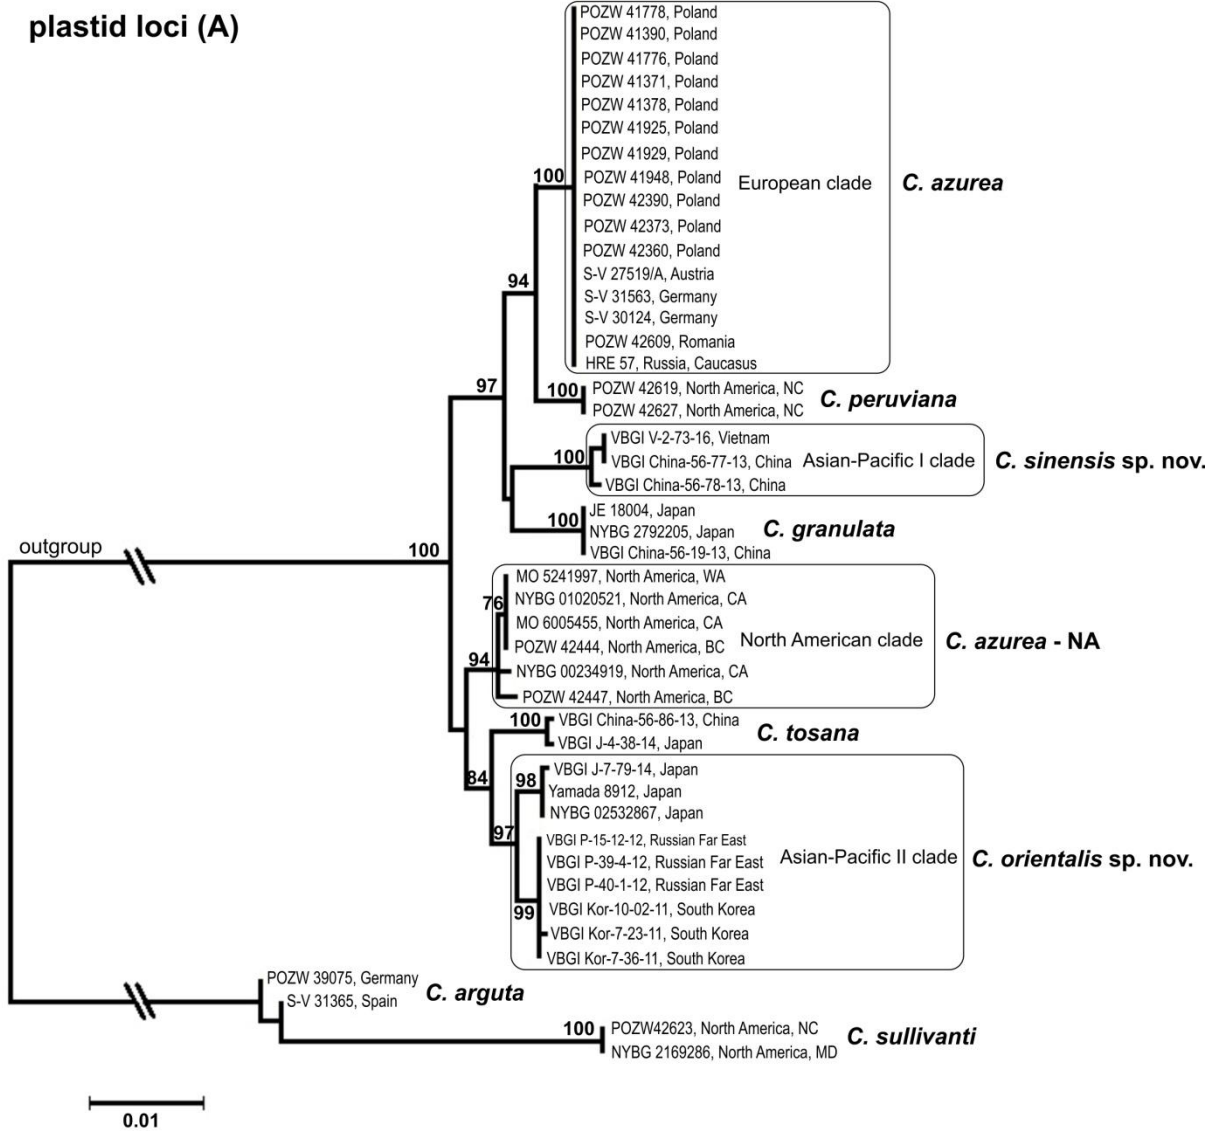

ITS 2 (A)

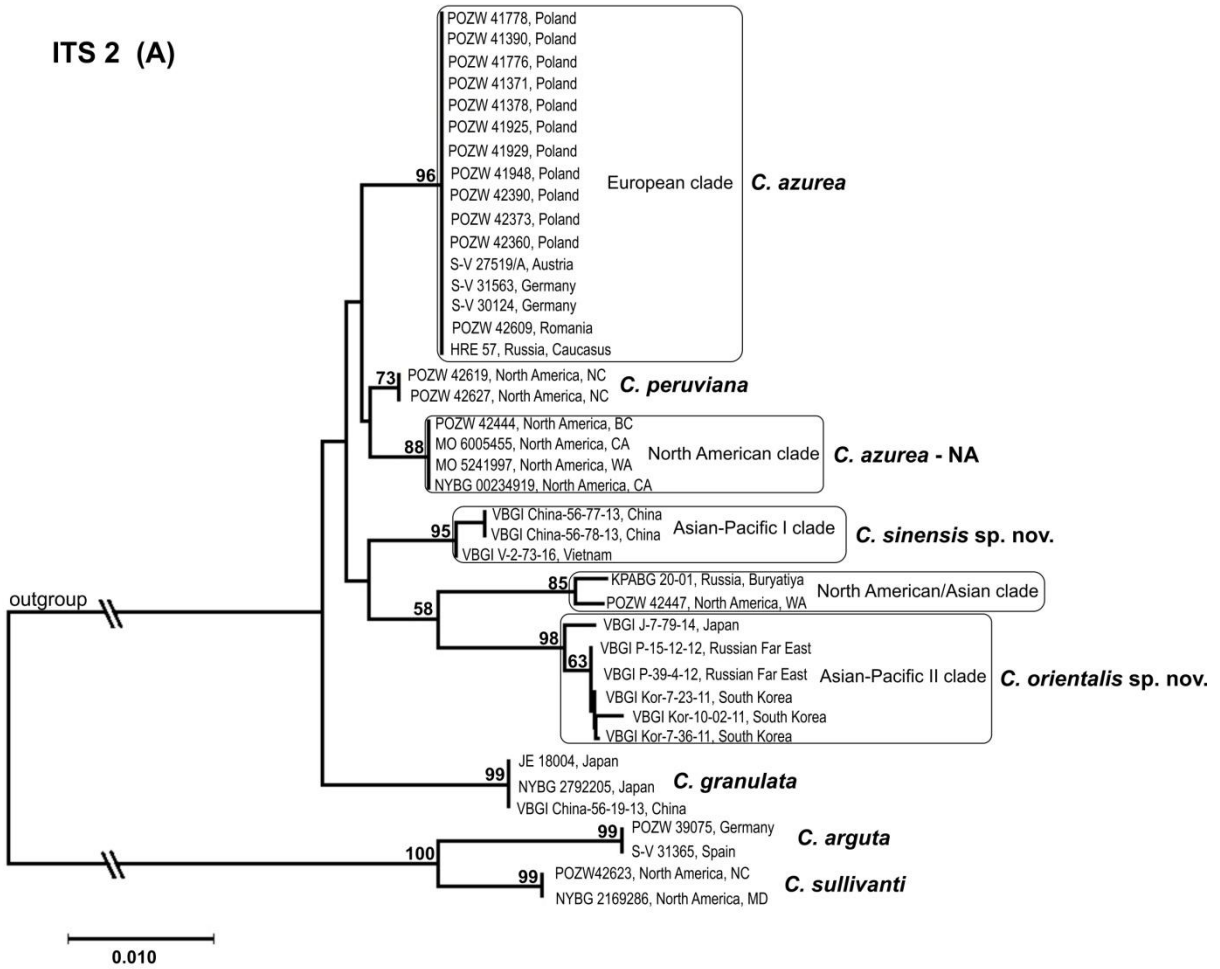

plastid loci (B)

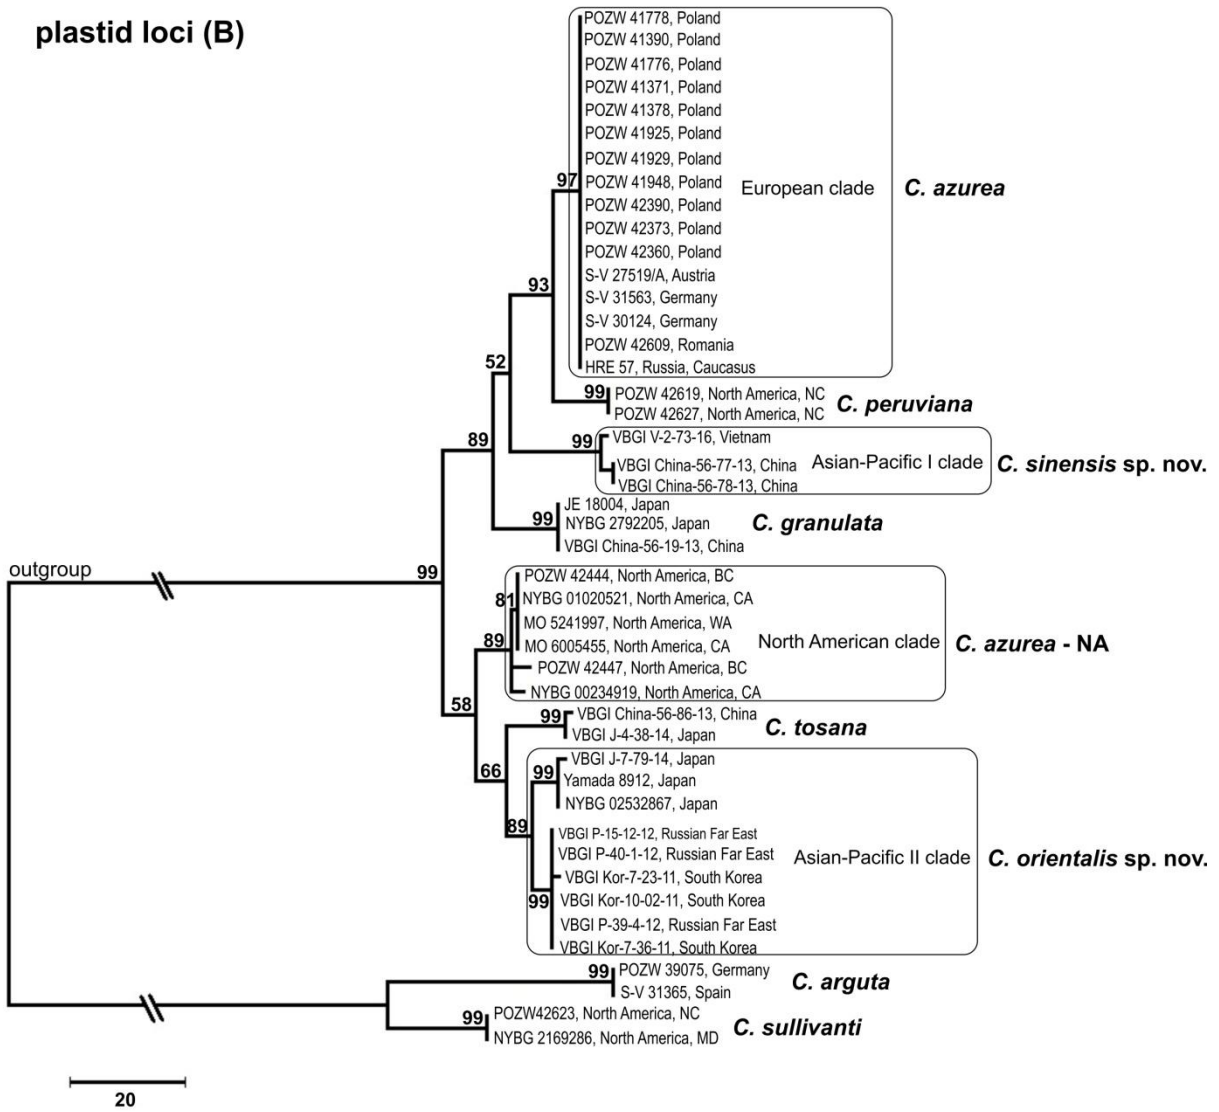

ITS 2 (B)

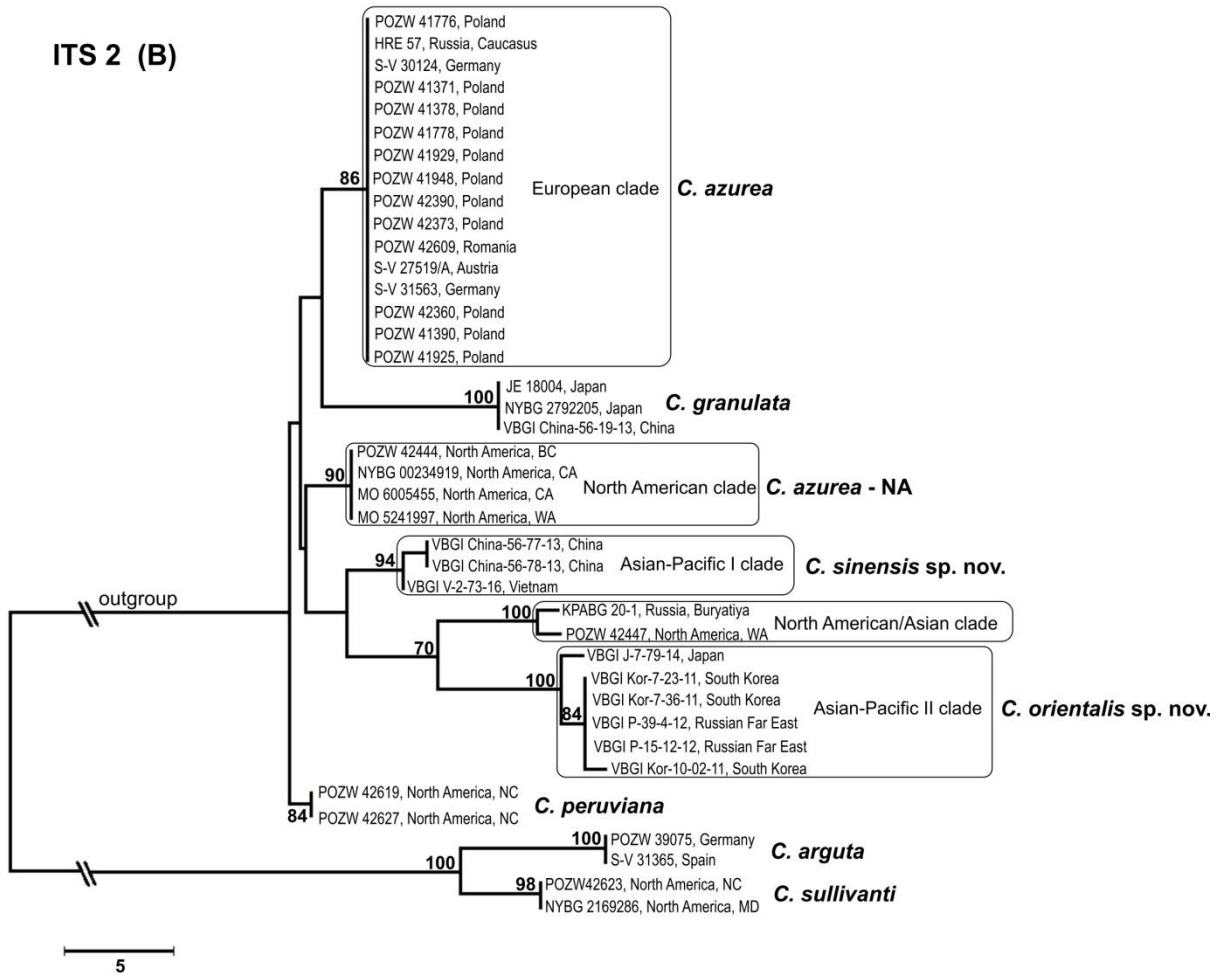

Supplement: pone.0204561.s001.pdf [file pone.0204561.s001.pdf]
