# Supplementary material for: Does Calypogeia azurea (Calypogeiaceae, Marchantiophyta) occur outside Europe? Molecular and morphological evidence
Source: PubMed Central journal article supplement (PMC6179228; doi:10.1371/journal.pone.0204561), 2018-10-10
Supplement: pone.0204561.s006.pdf [file pone.0204561.s006.pdf]

**S4 Table. Descriptive statistics for *C. azurea* s. str., *C. azurea* – NA, *C. sinensis* and *C. orientalis*.**

The means, minimum and maximum values of 47 quantitative traits were calculated according to Buczkowska (2004),

N - number of measurements.

| No. | Character                                                               | <i>C. azurea</i> s. str. N = 800 |         |         | <i>C. azurea</i> - NA N = 300 |        |         | <i>C. sinensis</i> N = 150 |         |         | <i>C. orientalis</i> N = 450 |        |         |
|-----|-------------------------------------------------------------------------|----------------------------------|---------|---------|-------------------------------|--------|---------|----------------------------|---------|---------|------------------------------|--------|---------|
|     |                                                                         | Mean                             | Min     | Max     | Mean                          | Min    | Max     | Mean                       | Min     | Max     | Mean                         | Min    | Max     |
| 1   | width of cells of rhizoid initial field in underleaf                    | 21,31                            | 19,99   | 23,86   | 16,52                         | 15,17  | 18,45   | 13,92                      | 12,91   | 14,92   | 13,11                        | 12,20  | 14,18   |
| 2   | length of cells of rhizoid initial field in underleaf                   | 23,70                            | 20,47   | 28,30   | 19,36                         | 16,52  | 20,90   | 18,22                      | 16,70   | 19,73   | 14,70                        | 13,25  | 16,43   |
| 3   | width of cells in underleaf lobe                                        | 33,68                            | 27,80   | 38,84   | 27,93                         | 24,86  | 33,60   | 25,27                      | 24,40   | 26,14   | 23,03                        | 20,33  | 27,43   |
| 4   | length of cells in underleaf lobe                                       | 50,19                            | 44,17   | 61,02   | 39,59                         | 36,12  | 47,00   | 40,24                      | 36,79   | 43,68   | 29,76                        | 26,90  | 32,43   |
| 5   | width of cells in underleaf middle                                      | 30,37                            | 25,45   | 38,52   | 27,23                         | 23,77  | 31,24   | 23,10                      | 22,32   | 23,88   | 22,26                        | 19,42  | 25,62   |
| 6   | length of cells in underleaf middle                                     | 43,30                            | 36,55   | 53,63   | 43,25                         | 36,75  | 48,39   | 37,11                      | 35,47   | 38,75   | 30,91                        | 25,13  | 38,24   |
| 7   | number of cells between the sinus and base of underl.                   | 4,54                             | 3,00    | 6,00    | 3,25                          | 2,00   | 4,00    | 3,13                       | 2,00    | 4,00    | 2,14                         | 1,00   | 3,00    |
| 8   | width of underleaf                                                      | 681,99                           | 485,56  | 943,34  | 579,67                        | 303,11 | 772,51  | 743,43                     | 406,91  | 1009,95 | 458,64                       | 381,37 | 805,68  |
| 9   | length of the whole underleaf                                           | 586,03                           | 402,22  | 788,66  | 519,39                        | 258,54 | 688,23  | 571,35                     | 306     | 556,79  | 335,74                       | 202,77 | 301,06  |
| 10  | length of underleaf to the base of rhizoid initial field                | 498,19                           | 346,67  | 642,22  | 400,67                        | 200,89 | 582,95  | 445,42                     | 246,45  | 430,39  | 264,35                       | 160,75 | 301,26  |
| 11  | underleaf sinus depth                                                   | 189,09                           | 137,78  | 264,44  | 170,46                        | 124,51 | 229,26  | 168,21                     | 134,96  | 201,47  | 108,48                       | 74,42  | 155,58  |
| 12  | ratio of width to height of underleaf - 8/9                             | 1,17                             | 0,96    | 1,30    | 1,12                          | 1,05   | 1,17    | 1,30                       | 1,30    | 1,81    | 1,38                         | 1,71   | 1,91    |
| 13  | 'measure' of underleaf decurrence - 9/10                                | 1,18                             | 1,13    | 1,35    | 1,31                          | 1,18   | 1,44    | 1,28                       | 1,22    | 1,34    | 1,27                         | 1,20   | 1,34    |
| 14  | ratio of width of underleaf to width of stem - 8/47                     | 2,14                             | 1,50    | 2,84    | 2,27                          | 1,48   | 2,76    | 2,61                       | 2,13    | 3,09    | 2,23                         | 1,72   | 2,67    |
| 15  | width of marginal cells in dorsal part of leaf                          | 38,81                            | 35,13   | 43,22   | 31,00                         | 28,93  | 32,18   | 33,89                      | 32,42   | 35,36   | 34,48                        | 28,09  | 44,15   |
| 16  | length of marginal cells in dorsal part of leaf                         | 31,28                            | 29,04   | 34,65   | 27,93                         | 23,10  | 33,56   | 23,21                      | 21,27   | 25,16   | 24,71                        | 19,67  | 34,93   |
| 17  | width of median cells in leaf                                           | 41,92                            | 34,46   | 46,36   | 30,70                         | 27,65  | 34,41   | 26,39                      | 24,19   | 28,59   | 33,87                        | 27,30  | 42,92   |
| 18  | length of median cells in leaf                                          | 50,00                            | 43,89   | 60,35   | 37,61                         | 33,70  | 45,00   | 36,23                      | 35,84   | 36,61   | 40,96                        | 31,52  | 51,23   |
| 19  | width of cells at ventral leaf base                                     | 40,69                            | 34,34   | 48,36   | 31,78                         | 31,17  | 32,35   | 25,30                      | 23,20   | 27,39   | 32,24                        | 27,20  | 40,51   |
| 20  | length of cells at ventral leaf base                                    | 61,26                            | 52,65   | 73,02   | 49,28                         | 46,04  | 52,51   | 48,22                      | 47,98   | 48,46   | 46,97                        | 34,18  | 58,91   |
| 21  | width of 2nd row marginal cells in dorsal part of leaf                  | 36,30                            | 30,84   | 39,70   | 29,55                         | 23,28  | 34,68   | 26,02                      | 25,86   | 26,18   | 27,55                        | 23,76  | 35,67   |
| 22  | length of 2nd row marginal cells in dorsal part of leaf                 | 38,45                            | 35,61   | 44,36   | 32,31                         | 28,11  | 37,96   | 30,59                      | 30,54   | 30,65   | 32,32                        | 25,91  | 43,92   |
| 23  | length of leaf                                                          | 1206,31                          | 972,22  | 1621,11 | 953,77                        | 604,39 | 1124,16 | 1325,97                    | 1225,32 | 1426,62 | 1044,48                      | 824,12 | 1469,27 |
| 24  | width of leaf                                                           | 1419,41                          | 1093,33 | 2171,11 | 1070,61                       | 588,43 | 1388,96 | 1185,02                    | 1022,34 | 1347,71 | 943,80                       | 718,24 | 1281,19 |
| 25  | height of dorsal part of leaf                                           | 475,77                           | 357,78  | 707,94  | 407,77                        | 255,49 | 472,17  | 456,81                     | 383,32  | 530,30  | 390,54                       | 296,34 | 511,82  |
| 26  | distance from apex to ventral base of leaf                              | 1478,71                          | 1128,89 | 2067,78 | 1201,88                       | 741,69 | 1431,15 | 1483,54                    | 1473,90 | 1493,17 | 1117,60                      | 862,08 | 1511,96 |
| 27  | length of the 1st coordinate                                            | 1052,24                          | 811,11  | 1576,66 | 845,39                        | 497,23 | 1022,79 | 1041,34                    | 875,09  | 1207,60 | 846,31                       | 657,84 | 1191,78 |
| 28  | length of the 2nd coordinate                                            | 1008,82                          | 753,33  | 1547,77 | 798,03                        | 457,68 | 1003,97 | 946,41                     | 778,89  | 1113,93 | 757,42                       | 583,41 | 1069,37 |
| 29  | length of the 3rd coordinate                                            | 965,20                           | 654,44  | 1523,33 | 734,46                        | 392,58 | 959,05  | 860,17                     | 674,13  | 1046,20 | 684,86                       | 521,03 | 976,66  |
| 30  | ratio of length to width of leaf - 23/24                                | 0,87                             | 0,75    | 0,96    | 0,91                          | 0,77   | 1,03    | 1,13                       | 1,06    | 1,20    | 1,11                         | 1,03   | 1,16    |
| 31  | ratio of leaf length to distance from apex to ventral leaf base - 23/26 | 0,82                             | 0,73    | 0,90    | 0,80                          | 0,78   | 0,81    | 0,89                       | 0,83    | 0,96    | 0,93                         | 0,87   | 0,97    |
| 32  | ratio of distance A-C to the 1st coordinate - 26/27                     | 1,42                             | 1,30    | 1,49    | 1,43                          | 1,33   | 1,49    | 1,46                       | 1,24    | 1,68    | 1,33                         | 1,27   | 1,40    |
| 33  | ratio of length of leaf dorsal part to width of leaf 25/24              | 0,34                             | 0,30    | 0,36    | 0,39                          | 0,34   | 0,43    | 0,38                       | 0,37    | 0,39    | 0,42                         | 0,40   | 0,45    |
| 34  | width of stem cells in the 4th internode                                | 27,71                            | 20,05   | 34,83   | 21,20                         | 15,13  | 28,08   | 23,06                      | 22,71   | 23,41   | 19,95                        | 18,48  | 22,07   |
| 35  | length of stem cells in the 4th internode                               | 59,46                            | 46,30   | 86,87   | 57,21                         | 30,46  | 76,54   | 55,65                      | 50,64   | 60,65   | 50,41                        | 41,05  | 55,68   |
| 36  | width of stem cells in the 5th internode                                | 27,71                            | 20,05   | 35,05   | 21,20                         | 15,13  | 28,08   | 23,06                      | 22,71   | 23,41   | 19,95                        | 18,48  | 22,07   |
| 37  | length of stem cells in the 5th internode                               | 60,08                            | 41,63   | 89,21   | 57,21                         | 30,46  | 76,54   | 55,65                      | 50,64   | 60,65   | 50,41                        | 41,05  | 55,68   |

|                                              |         |         |         |         |         |         |         |         |         |         |         |         |
|----------------------------------------------|---------|---------|---------|---------|---------|---------|---------|---------|---------|---------|---------|---------|
| 38 width of stem cells in the 6th internode  | 27,72   | 20,05   | 34,83   | 21,20   | 15,13   | 28,08   | 23,06   | 22,71   | 23,41   | 19,95   | 18,48   | 22,07   |
| 39 length of stem cells in the 6th internode | 60,68   | 47,79   | 84,11   | 57,21   | 30,46   | 76,54   | 55,65   | 50,64   | 60,65   | 50,41   | 41,05   | 55,68   |
| 40 number of stem cells in the 4th internode | 10,10   | 6,93    | 13,93   | 9,25    | 8,00    | 12,00   | 10,50   | 10,00   | 11,00   | 8,14    | 7,00    | 10,00   |
| 41 number of stem cells in the 5th internode | 10,15   | 6,74    | 14,87   | 11,00   | 10,00   | 13,00   | 10,00   | 9,00    | 11,00   | 9,71    | 8,00    | 11,00   |
| 42 number of stem cells in the 6th internode | 10,47   | 6,93    | 14,53   | 12,25   | 11,00   | 14,00   | 11,00   | 10,00   | 12,00   | 10,36   | 8,00    | 11,00   |
| 43 length of the 4th internode               | 707,98  | 536,98  | 1171,58 | 578,12  | 312,37  | 760,33  | 719,45  | 632,54  | 806,35  | 435,94  | 323,46  | 552,56  |
| 44 length of the 5th internode               | 719,42  | 518,67  | 1250,91 | 578,12  | 312,37  | 760,33  | 719,45  | 632,54  | 806,35  | 435,94  | 323,46  | 552,56  |
| 45 length of the 6th internode               | 731,63  | 500,36  | 1250,91 | 578,12  | 312,37  | 760,33  | 719,45  | 632,54  | 806,35  | 435,94  | 323,46  | 552,56  |
| 46 width of the whole plant                  | 1993,24 | 1697,58 | 2773,97 | 1678,12 | 1239,86 | 2071,87 | 1939,36 | 1927,25 | 2951,46 | 1597,71 | 1291,28 | 2436,43 |
| 47 width of stem (without leaves)            | 330,17  | 266,81  | 453,99  | 251,35  | 204,20  | 301,05  | 295,53  | 235,07  | 355,99  | 206,28  | 166,15  | 238,03  |
